# Supplementary material for: Oncogenomics of c-Myc transgenic mice reveal novel regulators of extracellular signaling, angiogenesis and invasion with clinical significance for human lung adenocarcinoma
Source: PubMed Central journal article supplement (PMC5731916; doi:10.18632/oncotarget.21981), 2017-10-23
Supplement: oncotarget-08-101808-s001.pdf [file oncotarget-08-101808-s001.pdf]

## Oncogenomics of c-Myc transgenic mice reveal novel regulators of extracellular signaling, angiogenesis and invasion with clinical significance for human lung adenocarcinoma

### SUPPLEMENTARY MATERIALS

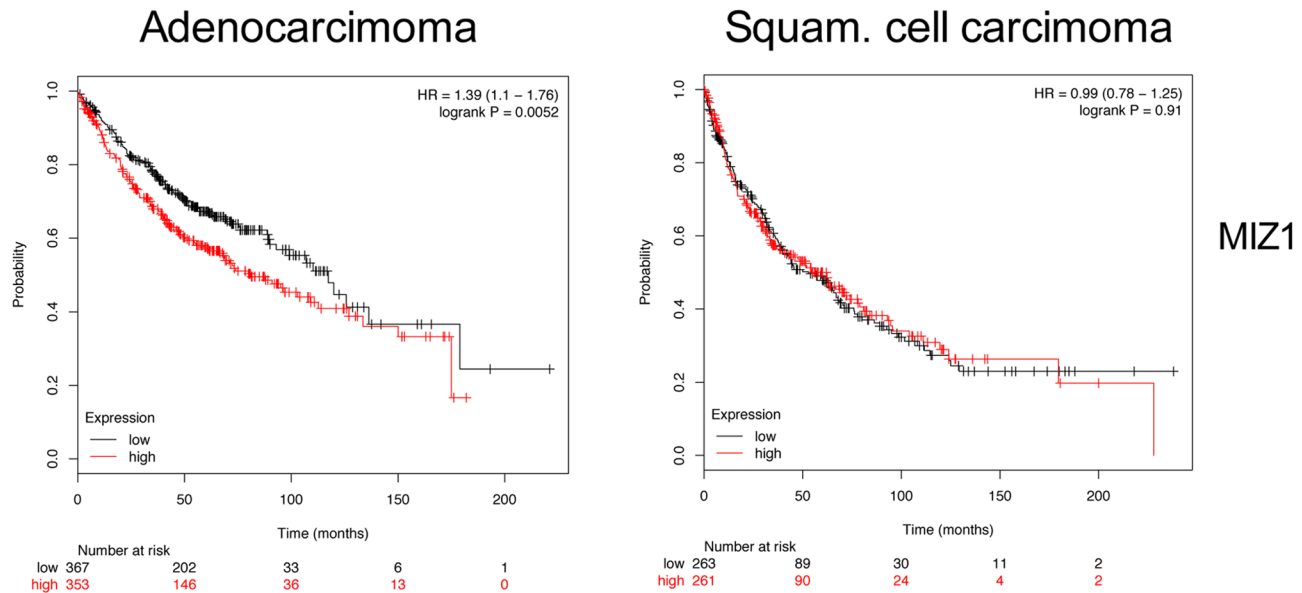

**Supplementary Figure 1: Kaplan–Meier survival statistics of Miz1.** Kaplan–Meier curves of lung adenocarcinoma (left panel) and lung squamous cell carcinoma (right panel) were generated using KM plotter tool by considering the expression of the c-Myc cofactor Miz1. Red and black curves always represent patients with high and low expression levels of Miz1. Given underneath each curve is the number of patients considered. Additionally the Hazard Ratios and the *p*-values are shown in the plot.

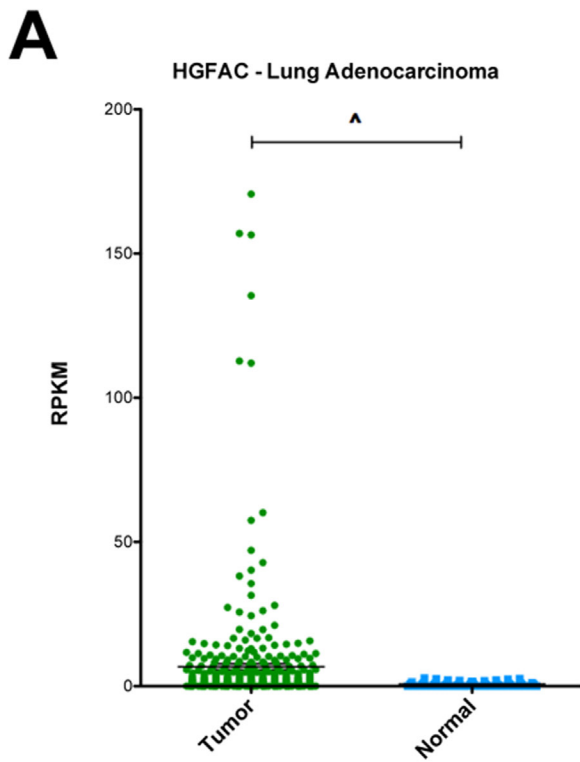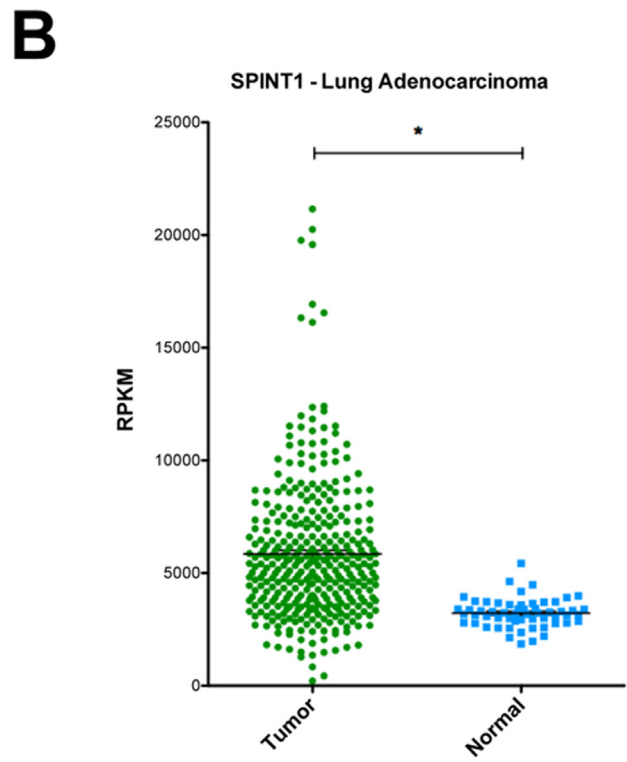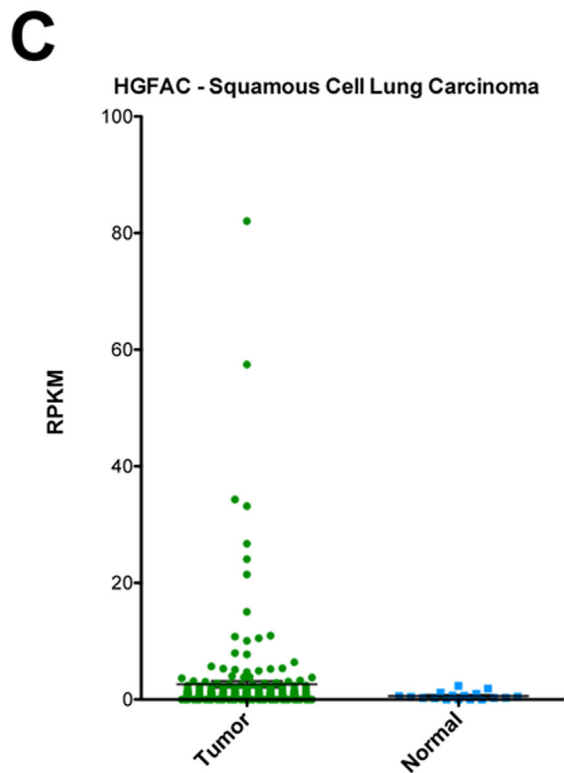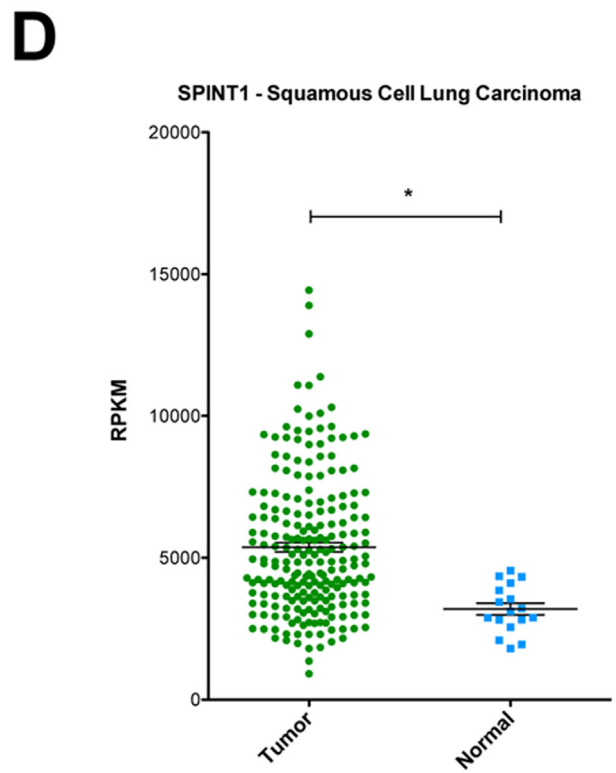

**Supplementary Figure 2: RNA-seq of candidate genes in human lung cancer and matched normal tissue.** (A–D) Relative expression values from RNA-seq data (TCGA) of selected genes in 355 lung adenocarcinoma (green circles, compared to 57 normal samples, light blue squares) (A–B) or 220 lung squamous cell carcinoma (green circles, compared to 17 normal samples, light blue squares) (C–D). Shown are the means and standard errors. ^ =  $p < 0.05$ ; \* =  $p < 0.01$ .

**A**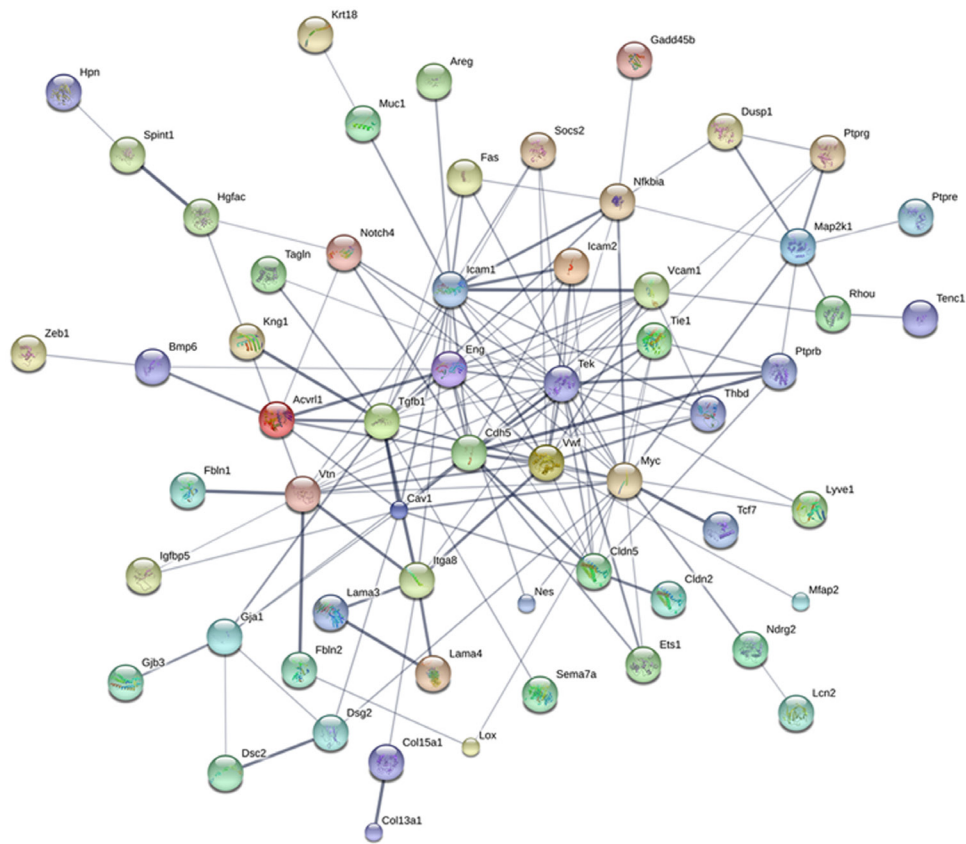**B**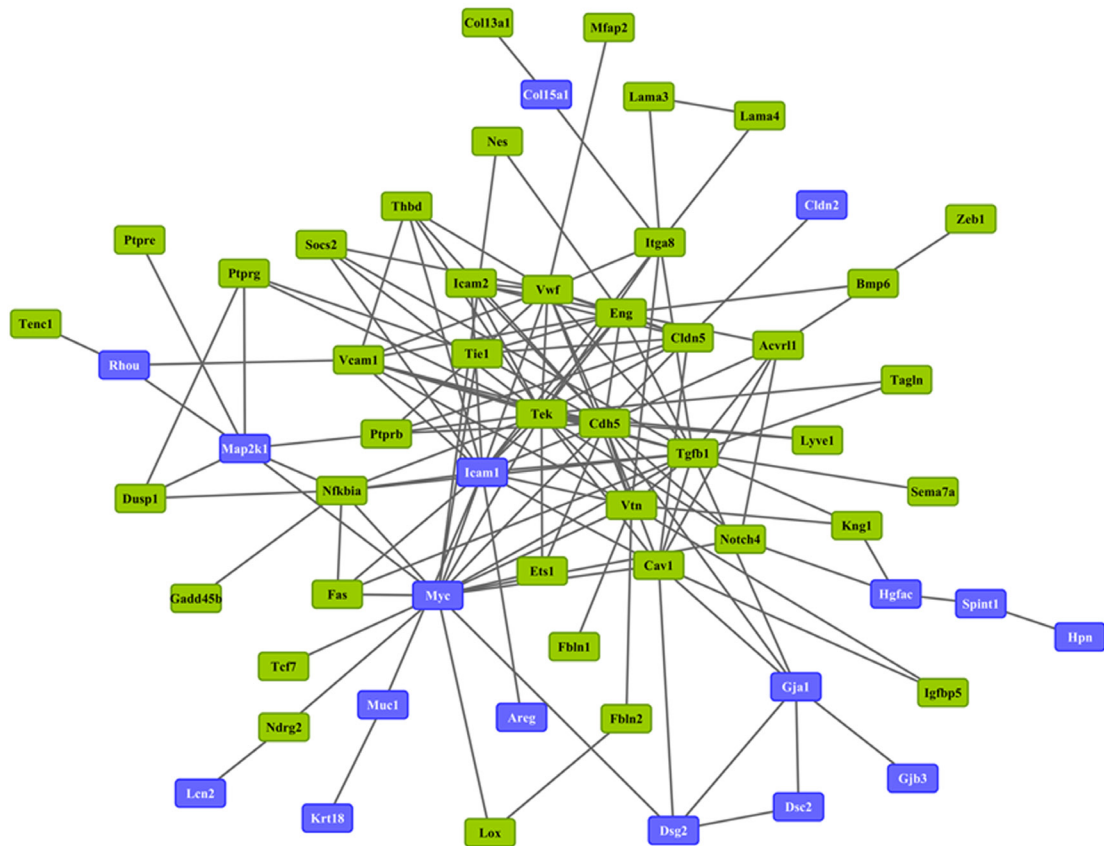

**Supplementary Figure 3: STRING protein-protein interaction network of c-Myc regulated genes in papillary lung adenocarcinomas.** A total of 59 out of 97 DEGs interact with each. Shown in panel A is the String PPI network. Shown in panel B is the String PPI network visualized by Cytoscape (the blue and green color nodes are up- and down regulated DEGs, respectively).

**Supplementary Table 1: Comprehensive listing of significantly regulated genes in c-Myc-induced lung papillary adenocarcinomas.** See Supplementary\_Table\_1

**Supplementary Table 2: Fold changes of gene expression in lung tumors determined by RT-PCR and microarray analysis**

| Gene   | Method     | Mean FC $\pm$ SD  |                   |                   |
|--------|------------|-------------------|-------------------|-------------------|
|        |            | Size of tumors    |                   |                   |
|        |            | Small             | Medium            | Large             |
| Ros1   | RT-PCR     | 3.21 $\pm$ 0.73   | 3.07 $\pm$ 1.02   | 3.17 $\pm$ 0.19   |
|        | Affymetrix | 9.26 $\pm$ 2.23   | 13.22 $\pm$ 4.41  | 21.85 $\pm$ 4.77  |
| Ect2   | RT-PCR     | 3.14 $\pm$ 1.25   | 3.18 $\pm$ 0.90   | 3.50 $\pm$ 1.31   |
|        | Affymetrix | 10.25 $\pm$ 1.34  | 4.61 $\pm$ 1.80   | 4.44 $\pm$ 2.06   |
| Traf4  | RT-PCR     | 2.58 $\pm$ 0.40   | 2.56 $\pm$ 0.40   | 2.74 $\pm$ 0.42   |
|        | Affymetrix | 4.30 $\pm$ 0.41   | 5.02 $\pm$ 0.50   | 4.49 $\pm$ 0.22   |
| Hgfac  | RT-PCR     | 3.32 $\pm$ 0.15   | 4.77 $\pm$ 0.50   | 5.11 $\pm$ 0.87   |
|        | Affymetrix | 4.70 $\pm$ 0.03   | 9.57 $\pm$ 0.59   | 8.65 $\pm$ 0.43   |
| Adam19 | RT-PCR     | 2.98 $\pm$ 0.99   | 3.74 $\pm$ 0.44   | 3.84 $\pm$ 0.23   |
|        | Affymetrix | 3.17 $\pm$ 0.24   | 3.33 $\pm$ 1.31   | 3.14 $\pm$ 0.70   |
| Bmp6   | RT-PCR     | -7.28 $\pm$ 2.49  | -11.86 $\pm$ 2.91 | -33.03 $\pm$ 7.14 |
|        | Affymetrix | -15.47 $\pm$ 1.26 | -34.84 $\pm$ 0.88 | -22.81 $\pm$ 1.05 |
| Acvr11 | RT-PCR     | -6.86 $\pm$ 1.65  | -18.83 $\pm$ 4.92 | -22.59 $\pm$ 7.00 |
|        | Affymetrix | -5.89 $\pm$ 1.02  | -6.73 $\pm$ 0.79  | -7.59 $\pm$ 0.45  |
| Igfbp5 | RT-PCR     | -3.18 $\pm$ 1.03  | -3.05 $\pm$ 0.73  | -2.81 $\pm$ 1.05  |
|        | Affymetrix | -6.51 $\pm$ 0.73  | -1.94 $\pm$ 1.43  | -4.85 $\pm$ 1.38  |
| Sema3f | RT-PCR     | -2.27 $\pm$ 0.13  | -3.25 $\pm$ 1.13  | -3.48 $\pm$ 1.10  |
|        | Affymetrix | -4.90 $\pm$ 0.28  | -5.40 $\pm$ 0.41  | -5.60 $\pm$ 0.29  |
| Cav1   | RT-PCR     | -2.91 $\pm$ 0.94  | -4.88 $\pm$ 0.46  | -6.19 $\pm$ 2.17  |
|        | Affymetrix | -4.04 $\pm$ 1.03  | -5.64 $\pm$ 2.24  | -6.54 $\pm$ 3.17  |
| Cdh5   | RT-PCR     | -2.17 $\pm$ 0.27  | -2.87 $\pm$ 0.22  | -3.30 $\pm$ 0.52  |
|        | Affymetrix | -7.18 $\pm$ 1.62  | -9.90 $\pm$ 1.04  | -9.95 $\pm$ 1.68  |

**Supplementary Table 3: Summary of ENCODE ChIP-seq data from human and murine databases.** See Supplementary\_Table\_3

**Supplementary Table 4: Clinical relevance of c-Myc responsive genes.** See Supplementary\_Table\_4

**Supplementary Table 5: Primer sequences used for RT-PCR, RT-qPCR, ChIP-qPCR and cloning experiments.** See Supplementary\_Table\_5

**Supplementary Table 6: Sequences of oligonucleotide probes for EMSA assays**

|                             |                               |
|-----------------------------|-------------------------------|
| Mouse_Map2k1                | 5'-GGTTCTCCGCGTGGGTTGGGCGG    |
| Mouse_Rhou                  | 5'-CGGGGTCCGCGTGGGTTGGCGTG    |
| Mouse_Traf4                 | 5'-TGAGCGGCGCGTGGCGCAGGAGA    |
| Mouse_Gjb3                  | 5'-GTGAGCCACCACGTGGTTGCTAG    |
| Mouse_Gja1                  | 5'-GTTGACTTCCACGTGGTTCTCTC    |
| Mouse_Dsg2                  | 5'-TGAGAAGCCCCACGCGCACCCCTC   |
| Mouse_Adam19                | 5'-CCTCCTCCGCGTGGCGCCTCCCC    |
| Mouse_Fas                   | 5'-GTGACATACACGTGTTCAAAGCG    |
| Mouse_Hoxa5                 | 5'-CAACAAAAGCACGTGATTCGAAG    |
| Mouse_Acvr11                | 5'-CAGACGGCGCGTGGCAGGGTCAG    |
| Mouse_Akap12                | 5'-CAGCTCCTGCCACGTGAGCCGCC    |
| Mouse_Vcam1                 | 5'-TTTCTCTCACGTGGCACTTATGA    |
| Mouse_Meox2                 | 5'-ATTGAGGAGCACGTGTTTCACTG    |
| Mouse_Sema7a                | 5'-TTGCCCGCACGTGGCAGTTGTCA    |
| Mouse_Sema3c                | 5'-TGCGGCGGGCCACGCGGGGCCCGC   |
| c-Myc_positive control _WT  | 5'-GGAAGCAGACCACGTGGTCTGCTTCC |
| c-Myc_positive control _Mut | 5'-GGAAGCAGACCACGGAGTCTGCTTCC |

**Supplementary Table 7: Demographic information of (A) lung adenocarcinoma and (B) squamous cell carcinoma patients from the TCGA consortium database. See Supplementary\_Table\_7**
